# Supplementary material
Source: PubMed Central journal article supplement (PMC3235649)
Supplement: NIHMS338933-supplement-1_si_001.pdf [file NIHMS338933-supplement-1_si_001.pdf]

**Supporting Information for:**

**Binding of 3,4,5,6-tetrahydroxyazepanes to the acid- $\beta$ -glucosidase active site:  
implications for pharmacological chaperone design for Gaucher disease**

Susan D. Orwig, Yun Lei Tan, Neil P. Grimster, Zhanqian Yu, Evan Powers, Jeffery W. Kelly, and Raquel L. Lieberman

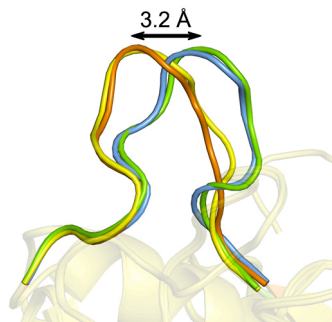

**Supporting Fig. S1.** Comparison of Loop 2 orientation for **1-** (yellow), **2-** (orange), IFG- (green), and glycerol- (light blue) bound GCCase.

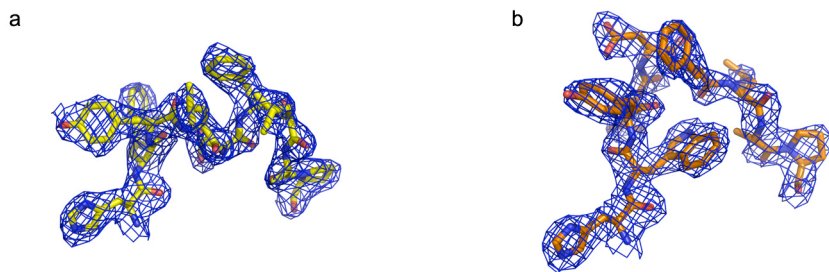

**Supporting Fig. S2.** The final GCase Loop 1 model for **1** (left) and **2** (right) with  $2F_o - F_c$  electron density contoured to  $1\sigma$ .
